# Supplementary material for: Fabrication of fullerene-supported La2O3–C60 nanocomposites: dual-functional materials for photocatalysis and supercapacitor electrodes
Source: Royal Society of Chemistry journal article supplement (doi:10.1039/d2cp05357h), 2023-01-01
Supplement: d2cp05357h1.pdf [file d2cp05357h1.pdf]

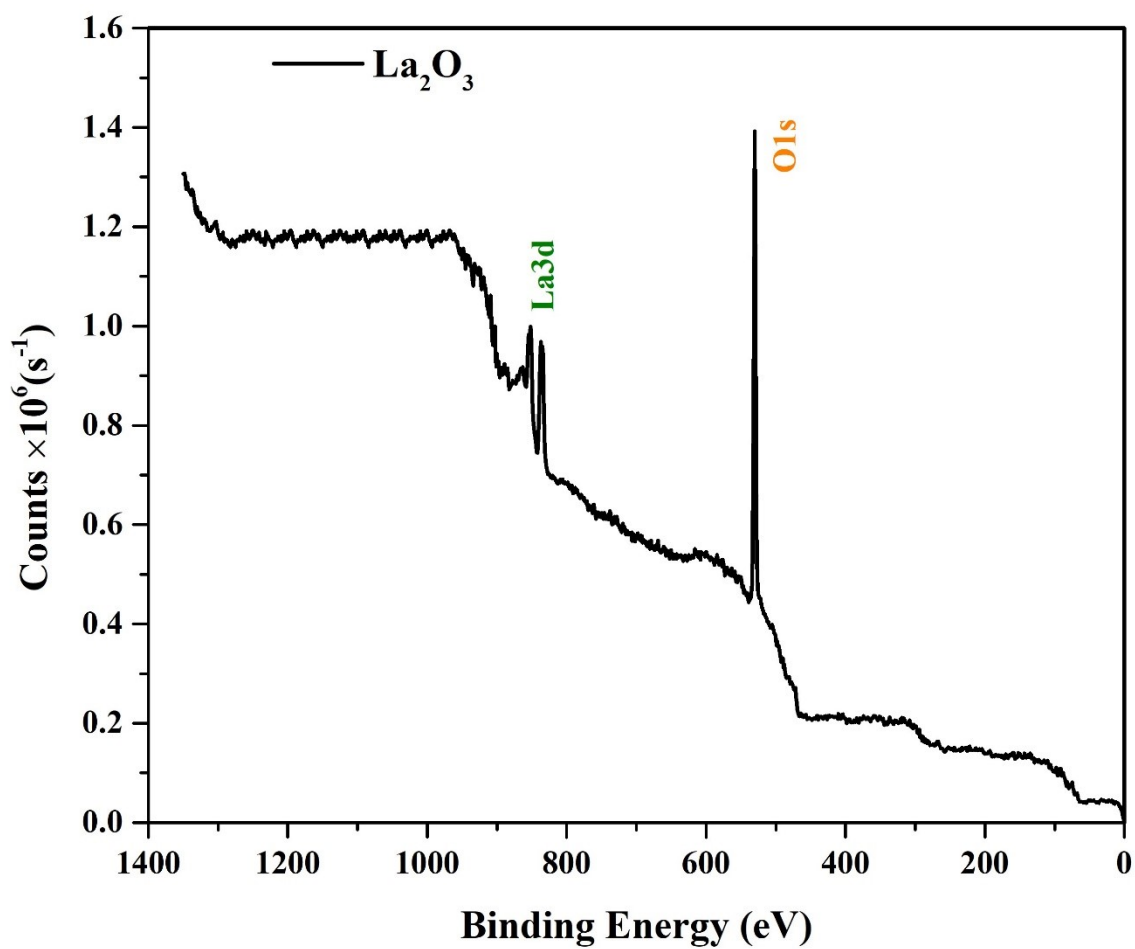

Fig. S1. XPS spectrum of pure  $\text{La}_2\text{O}_3$ .

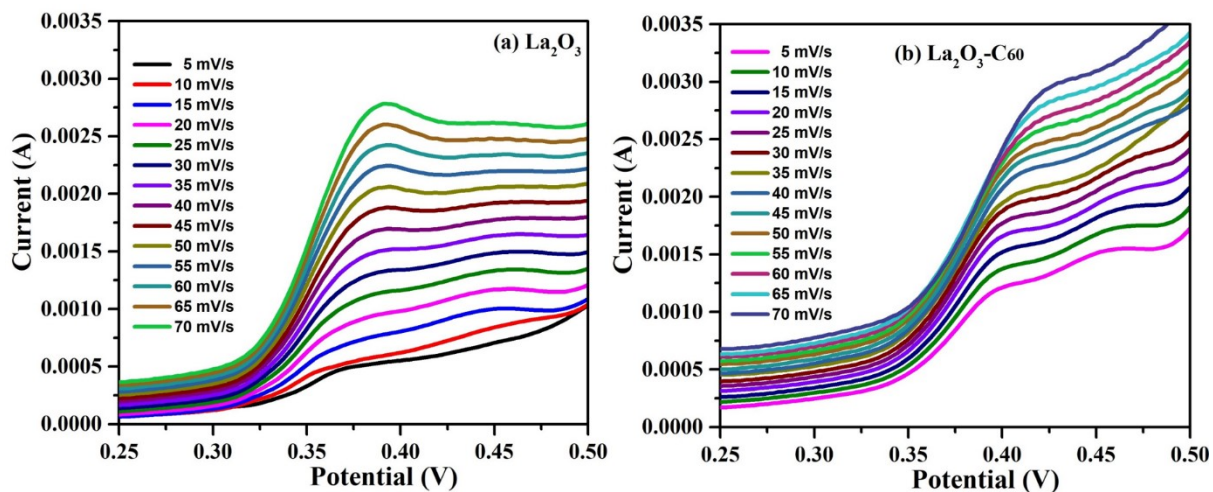

**Fig. S2.** Linear sweep voltammetry (LSV) curves at varying scan rates (a) pure  $\text{La}_2\text{O}_3$  (b)  $\text{La}_2\text{O}_3\text{-C}_{60}$  nanocomposite.

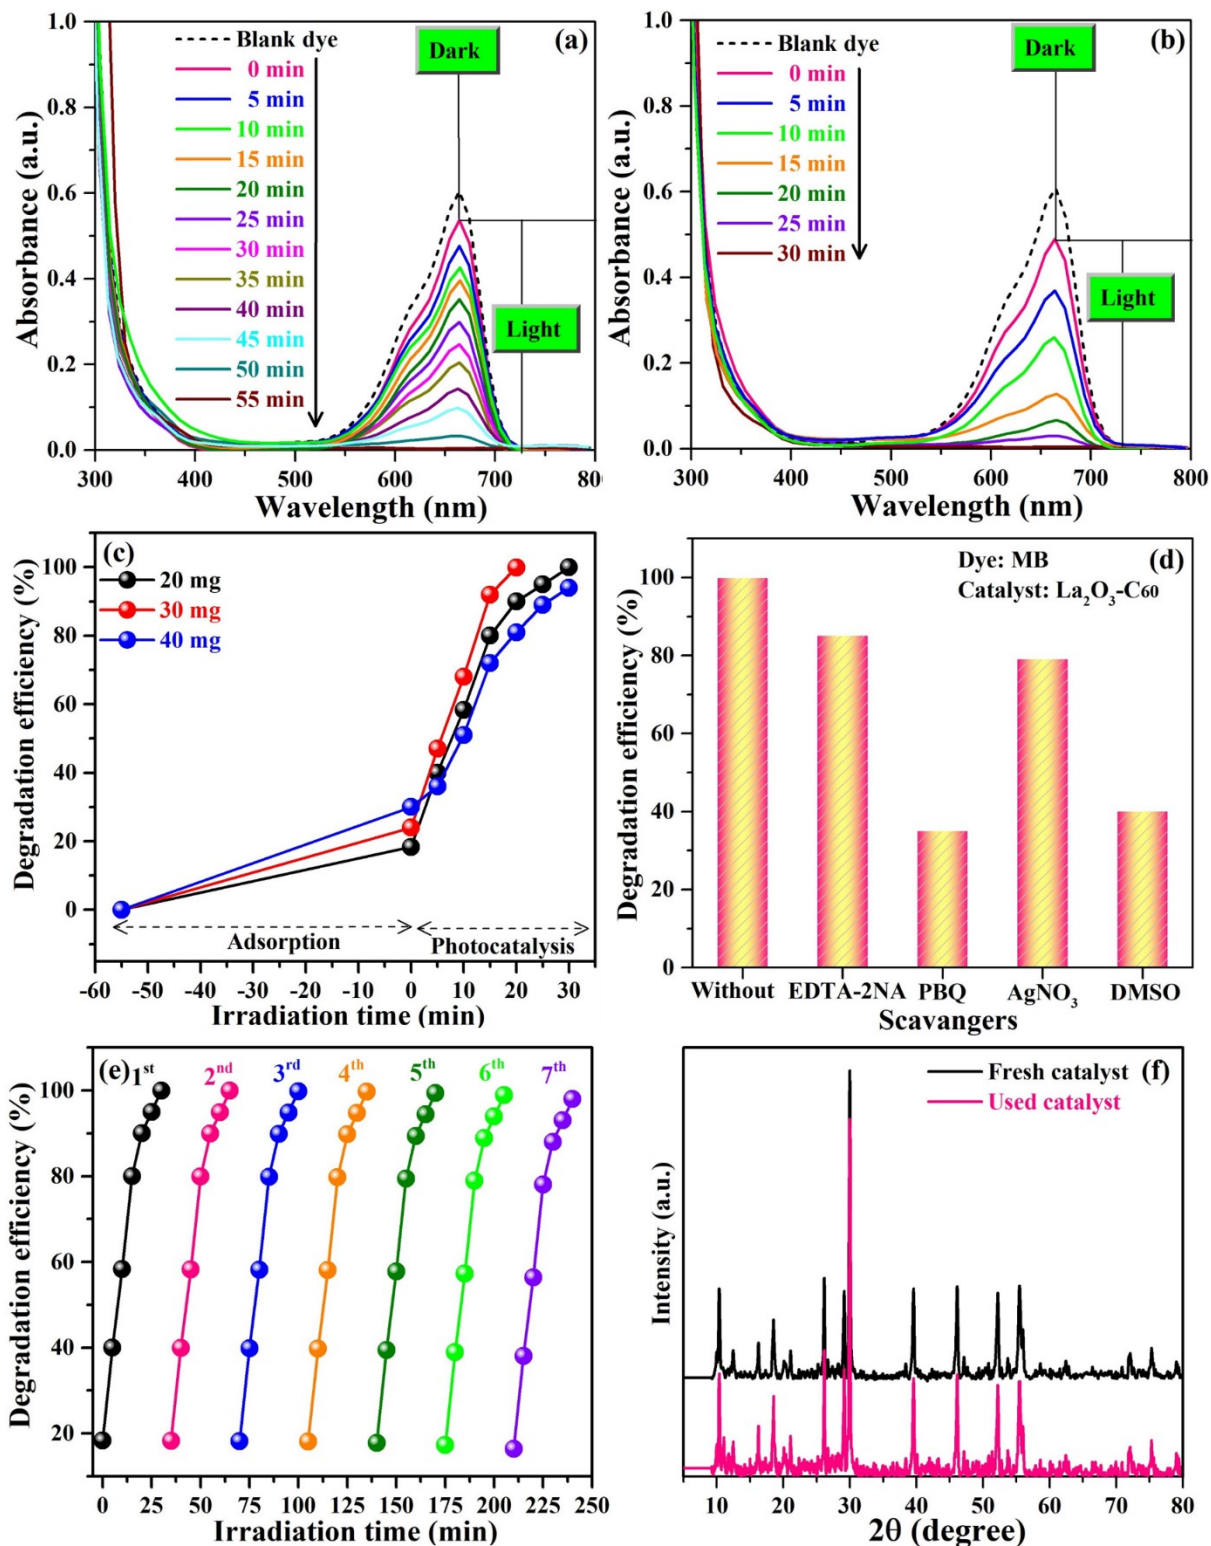

**Fig. S3.** absorption spectra of MB solution under UV-light irradiation at different times, (a)  $\text{La}_2\text{O}_3$ , (b)  $\text{La}_2\text{O}_3\text{-C}_{60}$  nanocomposite (c) degradation efficiency at varying catalyst amount, (d) photodegradation by adding different scavengers, (e) reusability profile, and (f) XRD pattern of the fresh and used catalyst after recyclability test.

**Table S1.** Comparison of specific capacitance of grown  $\text{La}_2\text{O}_3\text{-C}_{60}$  nanocomposites with other reported electrode materials.

| Material                                                | Electrolytes                 | Specific Capacitance<br>( $\text{Fg}^{-1}$ ) | Scan rate<br>( $\text{mVs}^{-1}$ ) | Ref.           |
|---------------------------------------------------------|------------------------------|----------------------------------------------|------------------------------------|----------------|
| $\text{La}_2\text{O}_3\text{-rGO}$                      | 1 M $\text{H}_2\text{SO}_4$  | 692                                          | 10                                 | 1              |
| $\text{La}_2\text{O}_3//\text{Co}_3\text{O}_4$          | 1 M KOH                      | 15                                           | 5                                  | 2              |
| Zn doped CdO                                            | 6M KOH                       | 388                                          | 10                                 | 3              |
| CdO                                                     | NaOH                         | 267                                          | 5                                  | 4              |
| $\text{La}_2\text{O}_3$ thin film                       | 1 M KOH                      | 147                                          | 5                                  | 5              |
| ZnO/rGO                                                 | 1 M $\text{Na}_2\text{SO}_4$ | 95                                           | 10                                 | 6              |
| $\text{La}_2\text{O}_3$                                 | 1M KOH                       | 250                                          | 5                                  | 7              |
| $\text{Cr}_2\text{O}_3\text{-carbon}$                   | 6 mol/L KOH                  | 300                                          | 2                                  | 8              |
| $\text{Cr}_2\text{O}_3/\text{rGO}$                      | 2M KOH                       | 206                                          | 10                                 | 9              |
| $\text{La}_2\text{O}_3$                                 | 1M $\text{LiClO}_4$          | 166                                          | 5                                  | 10             |
| Ag- $\text{La}_2\text{O}_3$                             | 0.1 M NaOH                   | 33                                           | 5                                  | 11             |
| Cr doped NiO                                            | 3M KOH                       | 636                                          | 5                                  | 12             |
| <b><math>\text{La}_2\text{O}_3\text{-C}_{60}</math></b> | <b>1M KOH</b>                | <b>741</b>                                   | <b>5</b>                           | <b>Present</b> |

**Table S2.** Photo-degradation kinetics parameters for La<sub>2</sub>O<sub>3</sub> and La<sub>2</sub>O<sub>3</sub>-C<sub>60</sub> nanocomposites.

| Equation: $y = a + b \cdot x$                   |           |                                |               |             |                         |
|-------------------------------------------------|-----------|--------------------------------|---------------|-------------|-------------------------|
| Catalysts                                       | Intercept | Slope = K (min <sup>-1</sup> ) | Adj. R-Square | Pearson's r | Residual Sum of Squares |
| La <sub>2</sub> O <sub>3</sub>                  | -0.19333  | 0.04681                        | 0.80771       | 0.90936     | 1.26082                 |
| C <sub>60</sub>                                 | 0.25526   | 0.02206                        | 0.87618       | 0.94264     | 0.1678                  |
| La <sub>2</sub> O <sub>3</sub> -C <sub>60</sub> | -0.01785  | 0.11472                        | 0.96916       | 0.98759     | 0.14566                 |

## References

- 1 M. Miah, S. Bhattacharya, D. Dinda and S. K. Saha, Temperature dependent supercapacitive performance in La<sub>2</sub>O<sub>3</sub> nano sheet decorated reduce graphene oxide, *Electrochim. Acta*, 2018, **260**, 449–458.
- 2 A. A. Yadav, A. C. Lokhande, J. H. Kim and C. D. Lokhande, High electrochemical performance asymmetric supercapacitor based on La<sub>2</sub>O<sub>3</sub>//Co<sub>3</sub>O<sub>4</sub> electrodes, *J. Ind. Eng. Chem.*, 2017, **56**, 90–98.
- 3 M. I. Pratheepa and M. Lawrence, Synthesis of pure, Cu and Zn doped CdO nanoparticles by co-precipitation method for supercapacitor applications, *Vacuum*, 2019, **162**, 208–213.
- 4 S. Patil, S. Raut, R. Gore and B. Sankapal, One-dimensional cadmium hydroxide nanowires towards electrochemical supercapacitor, *New J. Chem.*, 2015, **39**, 9124–9131.
- 5 A. A. Yadav, V. S. Kumbhar, S. J. Patil, N. R. Chodankar and C. D. Lokhande, Supercapacitive properties of chemically deposited La<sub>2</sub>O<sub>3</sub> thin film, *Ceram. Int.*, 2016, **42**, 2079–2084.
- 6 T. Prabhuraj, S. Prabhu, E. Dhandapani, N. Duraisamy, R. Ramesh, K. A. R. Kumar and P. Maadeswaran, Bifunctional ZnO sphere/r-GO composites for supercapacitor and photocatalytic activity of organic dye degradation, *Diam. Relat. Mater.*, 2021, **120**, 1–9.
- 7 A. A. Yadav, A. C. Lokhande, J. H. Kim and C. D. Lokhande, Supercapacitive activities of porous La<sub>2</sub>O<sub>3</sub> symmetric flexible solid-state device by hydrothermal method, *Int. J. Hydrogen Energy*, 2016, **41**, 18311–18319.
- 8 S. Ullah, I. A. Khan, M. Choucair, A. Badshah, I. Khan and M. A. Nadeem, A novel Cr<sub>2</sub>O<sub>3</sub>-carbon composite as a high performance pseudo-capacitor electrode material, *Electrochim. Acta*, 2015, **171**, 142–149.

- 9 C. Song, Y. Gui, X. Xing and W. Zhang, Well-dispersed chromium oxide decorated reduced graphene oxide hybrids and application in energy storage, *Mater. Chem. Phys.*, 2016, **173**, 460–466.
- 10 J. Zhang, Z. Zhang, Y. Jiao, H. Yang, Y. Li, J. Zhang and P. Gao, The graphene/lanthanum oxide nanocomposites as electrode materials of supercapacitors, *J. Power Sources*, 2019, **419**, 99–105.
- 11 H. Wang, X. Yan and G. Piao, A high-performance supercapacitor based on fullerene C60 whisker and polyaniline emeraldine base composite, *Electrochim. Acta*, 2017, **231**, 264–271.
- 12 R. Ahmed and G. Nabi, Enhanced Electrochemical Performance of Cr-doped NiO Nanorods for Supercapacitor Application, *J. Energy Storage*, 2021, **33**, 102115.
